# Supplementary material
Source: publisher figshare collection journal article supplement (https://rs.figshare.com/ndownloader/files/13001756)
Supplement: Supplementary file 1 [file 13001756]

## Sheet: Summary
Biomass Function Identifier	Stochiometric Coefficient Summations			Nucleotide (NTPS) and Amino Acid (AA) Stochiometric Comparisons
	Summation of Stochiometric Coefficients (exc. Energy metabolites)	NTPS Stochiometric Coefficients	AA Stochiometric Coefficients	NTPS %	AA %	NTPS:AA
iAB-AMØ-1410	6.71604	0.253638	5.80614	3.77661	86.4518	0.0436845
CHIKV	6.42746	0.466833	5.96063	7.2631	92.7369	0.0783194
DENV	5.61615	0.736381	4.87977	13.1118	86.8882	0.150905
ZIKV	5.68501	0.737473	4.94754	12.9722	87.0278	0.149059

## Sheet: iAB-AMØ-1410
Model Metabolite ID	Metabolite Name	Macromolecule	Present in virus biomass?	Stochiometric Coefficients, S [mmol/gDW]	|S|	|S| (without energy requirements)	Normalised_RNA Nucleotides	Normalised_Amino Acids
adp[c]	ADP	Energy Requirement	Yes	25.1735	25.1735
ala-L[c]	L-Alanine	Amino Acids	Yes	-0.396559	0.396559	0.396559		0.0590466
alpa_hs[c]	lysophosphatidic acid (homo sapiens)	Other	No	-0.0114991	0.0114991	0.0114991
amp[c]	AMP	RNA Nucleotide	Yes*	-0.0486641	0.0486641	0.0486641	0.00724594
arg-L[c]	L-Arginine	Amino Acids	Yes	-0.325725	0.325725	0.325725		0.0484995
asn-L[c]	L-Asparagine	Amino Acids	Yes	-0.215408	0.215408	0.215408		0.0320736
asp-L[c]	L-Aspartate	Amino Acids	Yes	-0.282759	0.282759	0.282759		0.042102
atp[c]	ATP	Energy Requirement	Yes	-25.1735	25.1735
chsterol[c]	Cholesterol	Other	No	-0.020931	0.020931	0.020931
cmp[c]	CMP	RNA Nucleotide	Yes*	-0.0423732	0.0423732	0.0423732	0.00630925
cys-L[c]	L-Cysteine	Amino Acids	Yes	-0.127154	0.127154	0.127154		0.018933
dag_hs[c]	diacylglycerol (homo sapiens)	Other	No	-0.0036682	0.0036682	0.0036682
damp[c]	dAMP	DNA Nucleotide	No	-0.0214953	0.0214953	0.0214953
dcmp[c]	dCMP	DNA Nucleotide	No	-0.0149374	0.0149374	0.0149374
dgmp[c]	dGMP	DNA Nucleotide	No	-0.0149374	0.0149374	0.0149374
dtmp[c]	dTMP	DNA Nucleotide	No	-0.0214953	0.0214953	0.0214953
h2o[c]	H2O	Energy Requirement	Yes	-25.1735	25.1735
gln-L[c]	L-Glutamine	Amino Acids	Yes	-0.280437	0.280437	0.280437		0.0417562
glu-L[c]	L-Glutamate	Amino Acids	Yes	-0.424429	0.424429	0.424429		0.0631963
gly[c]	Glycine	Amino Acids	Yes	-0.366948	0.366948	0.366948		0.0546376
glygn2[c]	glycogen, structure 2 (glycogenin-1,6-{7[1,4-Glc], 4[1,4-Glc]})	Other	No	-0.528028	0.528028	0.528028
gmp[c]	GMP	RNA Nucleotide	Yes*	-0.0437109	0.0437109	0.0437109	0.00650843
h[c]	H+	Energy Requirement	Yes	25.1735	25.1735
hdca[c]	Hexadecanoate (n-C16:0)	Other	No	-0.00485078	0.00485078	0.00485078
hdcea[c]	Hexadecenoate (n-C16:1)	Other	No	-0.00122229	0.00122229	0.00122229
his-L[c]	L-Histidine	Amino Acids	Yes	-0.153863	0.153863	0.153863		0.0229097
ile-L[c]	L-Isoleucine	Amino Acids	Yes	-0.259535	0.259535	0.259535		0.038644
leu-L[c]	L-Leucine	Amino Acids	Yes	-0.580614	0.580614	0.580614		0.0864518
lys-L[c]	L-Lysine	Amino Acids	Yes	-0.351852	0.351852	0.351852		0.0523898
met-L[c]	L-Methionine	Amino Acids	Yes	-0.126574	0.126574	0.126574		0.0188465
ocdca[c]	octadecanoate (n-C18:0)	Other	No	-0.00473671	0.00473671	0.00473671
ocdcea[c]	octadecenoate (n-C18:1)	Other	No	-0.00385312	0.00385312	0.00385312
pail_hs[c]	phosphatidylinositol (homo sapiens)	Other	No	-0.00374169	0.00374169	0.00374169
pchol_hs[c]	Phosphatidylcholine (homo sapiens)	Other	No	-0.0315271	0.0315271	0.0315271
pe_hs[c]	phosphatidylethanolamine (homo sapiens)	Other	No	-0.0211071	0.0211071	0.0211071
pglyc_hs[c]	phosphatidylglycerol (homo sapiens)	Other	No	-0.00891802	0.00891802	0.00891802
phe-L[c]	L-Phenylalanine	Amino Acids	Yes	-0.214247	0.214247	0.214247		0.0319007
pi[c]	Phosphate	Energy Requirement	Yes	25.1735	25.1735
pro-L[c]	L-Proline	Amino Acids	Yes	-0.346627	0.346627	0.346627		0.0516117
ps_hs[c]	phosphatidylserine (homo sapiens)	Other	No	-0.00102465	0.00102465	0.00102465
ser-L[c]	L-Serine	Amino Acids	Yes	-0.476684	0.476684	0.476684		0.070977
sphmyln_hs[c]	sphingomyelin (homo sapiens)	Other	No	-0.00704971	0.00704971	0.00704971
tag_hs[c]	triacylglycerol (homo sapiens)	Other	No	-0.00274244	0.00274244	0.00274244
thr-L[c]	L-Threonine	Amino Acids	Yes	-0.303661	0.303661	0.303661		0.0452143
trp-L[c]	L-Tryptophan	Amino Acids	Yes	-0.0696737	0.0696737	0.0696737		0.0103742
ttdca[c]	tetradecanoate (n-C14:0)	Other	No	-0.00136164	0.00136164	0.00136164
tyr-L[c]	L-Tyrosine	Amino Acids	Yes	-0.156185	0.156185	0.156185		0.0232555
ump[c]	UMP	RNA Nucleotide	Yes*	-0.0460248	0.0460248	0.0460248	0.00685296
val-L[c]	L-Valine	Amino Acids	Yes	-0.347207	0.347207	0.347207		0.0516982
				18.4575		6.71604
* RNA nucleotides are "XMP" in macrophage, "XTP" in virus

## Sheet: CHIKV
Model Metabolite ID	Metabolite Name	Macromolecule	Stochiometric Coefficients, S [mmol/gDW]	|S|	|S| (without energy requirements)	Normalised_Nucleotides	Normalised_Amino Acids	Host (iAB-AMØ-1410) Normalised Nucleotides	Host (iAB-AMØ-1410) Normalised Amino Acids	dN (Virus normalised nucleotide / Host normalised nucleotide) - 1	dX (Virus normalised amino acid / Host normalised amino acid - 1
adp[c]	ADP	Energy Requirement	23.8235	23.8235
ala-L[c]	L-Alanine	Amino Acids	-0.491959	0.491959	0.491959		0.0765402		0.0590466		0.296267
arg-L[c]	L-Arginine	Amino Acids	-0.27299	0.27299	0.27299		0.0424725		0.0484995		-0.124269
asn-L[c]	L-Asparagine	Amino Acids	-0.257615	0.257615	0.257615		0.0400803		0.0320736		0.249635
asp-L[c]	L-Aspartate	Amino Acids	-0.211192	0.211192	0.211192		0.0328578		0.042102		-0.219568
atp[c]*	ATP*	Nucleotide	-23.9401	23.9401	0.11661	0.0181424		0.00724594		1.5038
ctp[c]	CTP	Nucleotide	-0.116807	0.116807	0.116807	0.0181731		0.00630925		1.88039
cys-L[c]	L-Cysteine	Amino Acids	-0.233377	0.233377	0.233377		0.0363094		0.018933		0.917787
gln-L[c]	L-Glutamine	Amino Acids	-0.257477	0.257477	0.257477		0.0400588		0.0417562		-0.0406503
glu-L[c]	L-Glutamate	Amino Acids	-0.292017	0.292017	0.292017		0.0454328		0.0631963		-0.281085
gly[c]	Glycine	Amino Acids	-0.362678	0.362678	0.362678		0.0564263		0.0546376		0.0327383
gtp[c]	GTP	Nucleotide	-0.116807	0.116807	0.116807	0.0181731		0.00650843		1.79224
h[c]	H+	Energy Requirement	23.8235	23.8235
h2o[c]	H2O	Energy Requirement	-23.8235	23.8235
his-L[c]	L-Histidine	Amino Acids	-0.200139	0.200139	0.200139		0.0311381		0.0229097		0.359165
ile-L[c]	L-Isoleucine	Amino Acids	-0.29107	0.29107	0.29107		0.0452854		0.038644		0.171861
leu-L[c]	L-Leucine	Amino Acids	-0.392679	0.392679	0.392679		0.0610939		0.0864518		-0.293318
lys-L[c]	L-Lysine	Amino Acids	-0.376948	0.376948	0.376948		0.0586465		0.0523898		0.119426
met-L[c]	L-Methionine	Amino Acids	-0.148052	0.148052	0.148052		0.0230342		0.0188465		0.222201
phe-L[c]	L-Phenylalanine	Amino Acids	-0.162638	0.162638	0.162638		0.0253036		0.0319007		-0.206803
pi[c]	Phosphate	Energy Requirement	23.8235	23.8235
ppi[c]	Diphosphate	Energy Requirement	0.466794	0.466794
pro-L[c]	L-Proline	Amino Acids	-0.433753	0.433753	0.433753		0.0674843		0.0516117		0.307538
ser-L[c]	L-Serine	Amino Acids	-0.349098	0.349098	0.349098		0.0543136		0.070977		-0.234772
thr-L[c]	L-Threonine	Amino Acids	-0.43924	0.43924	0.43924		0.068338		0.0452143		0.511424
trp-L[c]	L-Tryptophan	Amino Acids	-0.0715487	0.0715487	0.0715487		0.0111317		0.0103742		0.0730174
tyr-L[c]	L-Tyrosine	Amino Acids	-0.233772	0.233772	0.233772		0.0363708		0.0232555		0.563962
utp[c]	UTP	Nucleotide	-0.11661	0.11661	0.11661	0.0181424		0.00685296		1.64738
val-L[c]	L-Valine	Amino Acids	-0.482386	0.482386	0.482386		0.0750508		0.0516982		0.451711
			17.8628	126.012	6.42746
* ATP |S| (without energy requirements) = |S_atp | - |S_adp|
This is due to the ATP stochiometry containing both the ATP in the viral genome and the ATP energy requirement terms

## Sheet: DENV
Model Metabolite ID	Metabolite Name	Macromolecule	Stochiometric Coefficients, S [mmol/gDW]	|S|	|S| (without energy requirements)	Normalised_Nucleotides	Normalised_Amino Acids	Host (iAB-AMØ-1410) Normalised Nucleotides	Host (iAB-AMØ-1410) Normalised Amino Acids	dN (Virus normalised nucleotide / Host normalised nucleotide) - 1	dX (Virus normalised amino acid / Host normalised amino acid - 1
adp[c]	ADP	Energy Requirement	19.4942	19.4942
ala-L[c]	L-Alanine	Amino Acids	-0.241248	0.241248	0.241248		0.0429562		0.0590466		-0.272504
arg-L[c]	L-Arginine	Amino Acids	-0.264837	0.264837	0.264837		0.0471564		0.0484995		-0.0276921
asn-L[c]	L-Asparagine	Amino Acids	-0.182945	0.182945	0.182945		0.0325748		0.0320736		0.0156256
asp-L[c]	L-Aspartate	Amino Acids	-0.139784	0.139784	0.139784		0.0248896		0.042102		-0.408826
atp[c]*	ATP*	Nucleotide	-19.6937	19.6937	0.199495	0.0355217		0.00724594		3.90229
ctp[c]	CTP	Nucleotide	-0.168695	0.168695	0.168695	0.0300375		0.00630925		3.76088
cys-L[c]	L-Cysteine	Amino Acids	-0.112589	0.112589	0.112589		0.0200474		0.018933		0.0588651
gln-L[c]	L-Glutamine	Amino Acids	-0.169451	0.169451	0.169451		0.030172		0.0417562		-0.277424
glu-L[c]	L-Glutamate	Amino Acids	-0.303294	0.303294	0.303294		0.054004		0.0631963		-0.145456
gly[c]	Glycine	Amino Acids	-0.445791	0.445791	0.445791		0.0793766		0.0546376		0.452785
gtp[c]	GTP	Nucleotide	-0.168695	0.168695	0.168695	0.0300375		0.00650843		3.61517
h[c]	H+	Energy Requirement	19.4942	19.4942
h2o[c]	H2O	Energy Requirement	-19.4942	19.4942
his-L[c]	L-Histidine	Amino Acids	-0.119079	0.119079	0.119079		0.021203		0.0229097		-0.0744997
ile-L[c]	L-Isoleucine	Amino Acids	-0.321012	0.321012	0.321012		0.0571588		0.038644		0.479112
leu-L[c]	L-Leucine	Amino Acids	-0.434872	0.434872	0.434872		0.0774324		0.0864518		-0.104329
lys-L[c]	L-Lysine	Amino Acids	-0.327055	0.327055	0.327055		0.0582348		0.0523898		0.111567
met-L[c]	L-Methionine	Amino Acids	-0.244236	0.244236	0.244236		0.0434881		0.0188465		1.30749
phe-L[c]	L-Phenylalanine	Amino Acids	-0.181674	0.181674	0.181674		0.0323486		0.0319007		0.0140392
pi[c]	Phosphate	Energy Requirement	19.4942	19.4942
ppi[c]	Diphosphate	Energy Requirement	0.736312	0.736312
pro-L[c]	L-Proline	Amino Acids	-0.1894	0.1894	0.1894		0.0337242		0.0516117		-0.346579
ser-L[c]	L-Serine	Amino Acids	-0.264734	0.264734	0.264734		0.0471381		0.070977		-0.335868
thr-L[c]	L-Threonine	Amino Acids	-0.445344	0.445344	0.445344		0.0792971		0.0452143		0.753806
trp-L[c]	L-Tryptophan	Amino Acids	-0.10143	0.10143	0.10143		0.0180604		0.0103742		0.740895
tyr-L[c]	L-Tyrosine	Amino Acids	-0.0700808	0.0700808	0.0700808		0.0124784		0.0232555		-0.463421
utp[c]	UTP	Nucleotide	-0.199495	0.199495	0.199495	0.0355217		0.00685296		4.18341
val-L[c]	L-Valine	Amino Acids	-0.320909	0.320909	0.320909		0.0571404		0.0516982		0.105269
			14.6144	103.823	5.61615
* ATP |S| (without energy requirements) = |S_atp | - |S_adp|
This is due to the ATP stochiometry containing both the ATP in the viral genome and the ATP energy requirement terms

## Sheet: ZIKV
Model Metabolite ID	Metabolite Name	Macromolecule	Stochiometric Coefficients, S [mmol/gDW]	|S|	|S| (without energy requirements)	Normalised_Nucleotides	Normalised_Amino Acids	Host (iAB-AMØ-1410) Normalised Nucleotides	Host (iAB-AMØ-1410) Normalised Amino Acids	dN (Virus normalised nucleotide / Host normalised nucleotide) - 1	dX (Virus normalised amino acid / Host normalised amino acid - 1
adp[c]	ADP	Energy Requirement	19.7654	19.7654
ala-L[c]	L-Alanine	Amino Acids	-0.388789	0.388789	0.388789		0.0683884		0.0590466		0.158211
arg-L[c]	L-Arginine	Amino Acids	-0.270455	0.270455	0.270455		0.0475733		0.0484995		-0.0190975
asn-L[c]	L-Asparagine	Amino Acids	-0.144195	0.144195	0.144195		0.025364		0.0320736		-0.209195
asp-L[c]	L-Aspartate	Amino Acids	-0.225396	0.225396	0.225396		0.0396474		0.042102		-0.0583025
atp[c]*	ATP*	Nucleotide	-19.9463	19.9463	0.180918	0.0318237		0.00724594		3.39193
ctp[c]	CTP	Nucleotide	-0.187819	0.187819	0.187819	0.0330375		0.00630925		4.23636
cys-L[c]	L-Cysteine	Amino Acids	-0.118369	0.118369	0.118369		0.0208212		0.018933		0.0997328
gln-L[c]	L-Glutamine	Amino Acids	-0.106549	0.106549	0.106549		0.0187421		0.0417562		-0.551155
glu-L[c]	L-Glutamate	Amino Acids	-0.239949	0.239949	0.239949		0.0422072		0.0631963		-0.332125
gly[c]	Glycine	Amino Acids	-0.475251	0.475251	0.475251		0.0835972		0.0546376		0.530032
gtp[c]	GTP	Nucleotide	-0.187819	0.187819	0.187819	0.0330375		0.00650843		4.07611
h[c]	H+	Energy Requirement	19.7654	19.7654
h2o[c]	H2O	Energy Requirement	-19.7654	19.7654
his-L[c]	L-Histidine	Amino Acids	-0.14317	0.14317	0.14317		0.0251837		0.0229097		0.0992585
ile-L[c]	L-Isoleucine	Amino Acids	-0.275032	0.275032	0.275032		0.0483785		0.038644		0.251902
leu-L[c]	L-Leucine	Amino Acids	-0.463192	0.463192	0.463192		0.0814761		0.0864518		-0.0575556
lys-L[c]	L-Lysine	Amino Acids	-0.312166	0.312166	0.312166		0.0549103		0.0523898		0.0481093
met-L[c]	L-Methionine	Amino Acids	-0.181772	0.181772	0.181772		0.0319739		0.0188465		0.696543
phe-L[c]	L-Phenylalanine	Amino Acids	-0.15598	0.15598	0.15598		0.0274371		0.0319007		-0.139922
pi[c]	Phosphate	Energy Requirement	19.7654	19.7654
ppi[c]	Diphosphate	Energy Requirement	0.737405	0.737405
pro-L[c]	L-Proline	Amino Acids	-0.163837	0.163837	0.163837		0.0288192		0.0516117		-0.441616
ser-L[c]	L-Serine	Amino Acids	-0.330886	0.330886	0.330886		0.0582032		0.070977		-0.179971
thr-L[c]	L-Threonine	Amino Acids	-0.368497	0.368497	0.368497		0.0648191		0.0452143		0.433597
trp-L[c]	L-Tryptophan	Amino Acids	-0.100981	0.100981	0.100981		0.0177626		0.0103742		0.712187
tyr-L[c]	L-Tyrosine	Amino Acids	-0.119154	0.119154	0.119154		0.0209594		0.0232555		-0.0987355
utp[c]	UTP	Nucleotide	-0.180918	0.180918	0.180918	0.0318237		0.00685296		3.64378
val-L[c]	L-Valine	Amino Acids	-0.36392	0.36392	0.36392		0.0640139		0.0516982		0.238223
			14.8178	105.25	5.68501
* ATP |S| (without energy requirements) = |S_atp | - |S_adp|
This is due to the ATP stochiometry containing both the ATP in the viral genome and the ATP energy requirement terms
